# Supplementary material for: Towards Model-Informed Precision Dosing of Voriconazole: Challenging Published Voriconazole Nonlinear Mixed-Effects Models with Real-World Clinical Data
Source: Springer Nature journal article supplement (doi:10.1007/s40262-023-01274-y), 2023-08-21
Supplement: MOESM2 [file 25944710]

Clinical Pharmacokinetics

**Towards model-informed precision dosing of voriconazole: Challenging published voriconazole nonlinear mixed-effects models with real-world clinical data**

Franziska Kluwe (1,2), Robin Michelet(1), Wilhelm Huisinga (3), Markus Zeitlinger (4), Gerd Mikus (1,5), Charlotte Kloft(1)*

(1) Department of Clinical Pharmacy and Biochemistry, Institute of Pharmacy, Freie Universitaet Berlin, Kelchstraße 31, 12169 Berlin, Germany

(2) Graduate Research Training Program PharMetrX, Berlin/Potsdam, Germany

(3) Institute of Mathematics, University of Potsdam, Karl-Liebknecht-Str. 24/25, 14476 Potsdam, Germany

(4) Department of Clinical Pharmacology, Medical University of Vienna, Waehringer Guertel 18-20, 1090 Vienna, Austria

(5) Department of Clinical Pharmacology and Pharmacoepidemiology, University Hospital Heidelberg, Im Neuenheimer Feld 419, 69120 Heidelberg, Germany

***Address correspondence to:**

Charlotte Kloft, charlotte.kloft@fu-berlin.de

Freie Universitaet Berlin

Institute of Pharmacy

Department of Clinical Pharmacy and Biochemistry

Kelchstraße 31

12169 Berlin, Germany

Phone: +49 30 838 50656,

Fax: +49 30 838 450656

1. Supplementary code

## NONMEM® code for nonlinear mixed-effects pharmacokinetic models of voriconazole

### Aggregate model

$PROBLEM McDougall et al. 2016 (“Hybrid model”)[1]

$INPUT …

$DATA …

$SUBROUTINE ADVAN13 TRANS1 TOL=6

$MODEL

NCOMP=3

COMP=(DEPOT)

COMP=(CENTRAL,DEFOBS)

COMP=(PERIPH)

$PK

; Michaelis–Menten constant (mg/L)

TVKM=THETA(1)

KM=TVKM*EXP(ETA(1))

; Maximum metabolic rate at 1 h (mg/h)

IF(NSEX.EQ.1) THEN

TVVMAX1=THETA(2)*(THETA(12)**PM)*((LBW/42)**THETA(4)) ; female

ELSE

TVVMAX1=THETA(2)*(THETA(12)**PM)*((LBW/54)**THETA(4)) ; male

ENDIF

VMAX1=TVVMAX1*EXP(ETA(2))

; Linear clearance (L/h)

IF(NSEX.EQ.1) THEN

TVCLL=THETA(3)*(LBW/42)**THETA(4) ; female

ELSE

TVCLL=THETA(3)*(LBW/54)**THETA(4) ; male

ENDIF

CLL=TVCLL*EXP(ETA(3))

; Exponent of LBW on CL and Vmax

EXPONENT=THETA(4)

; Central volume of distribution (L)

TVV2=THETA(5)*(WT/70)**1

V2=TVV2*EXP(ETA(4))

; Peripheral volume of distribution (L)

TVV3=THETA(6)*(WT/70)**1

V3=TVV3*EXP(ETA(5))

; Inter-compartmental clearance (L/h)

Q=THETA(7)*(WT/70)**1

; First order absorption rate constant (h-1)

KA=THETA(8)

; Oral bioavailability in adults

LOGITF=THETA(9)+ETA(6)

F1=EXP(LOGITF)/(1+EXP(LOGITF))

; Time to 50 % of inhibition of Vmax (h)

T50 = THETA(10)

; Maximum proportion of reduction of Vmax,1

VMAXINH = THETA(11)

; Proportion of Vmax for poor metabolizers

PM_VMAX = THETA(12)

; Proportion of total clearance for subjects taking an enzyme inhibitor

EINH_CL = THETA(13)

; Proportion of total clearance for subjects taking an enzyme inducer

EIND_CL = THETA(14)

; Scaling factors

S2=V2

S3=V3

$DES

VMAX=VMAX1*(1-VMAXINH*((T-1)/((T-1)+(T50-1))))

CLT=(CLL+VMAX/(KM+A(2)/V2))*(EINH_CL**EINH)*(EIND_CL**EIND)

DADT(1)= -KA*A(1) ; Gut CMT (V1)

DADT(2)= KA*A(1)-CLT*A(2)/V2-Q*A(2)/V2+Q*A(3)/V3 ; Central CMT (V2)

DADT(3)= Q*A(2)/V2-Q*A(3)/V3 ; Peripheral CMT (V3)

C2=A(2)/V2

C3=A(3)/V3

CLLOUT=CLL*(EINH_CL**EINH)*(EIND_CL**EIND)

CLN=(VMAX/(KM+A(2)/V2))*(EINH_CL**EINH)*(EIND_CL**EIND)

$ERROR

IPRED=F

W=F

IRES=DV-IPRED

IWRES=IRES/W

Y=F+F*EPS(1)

$THETA 1.92 FIX ; 1KM

$THETA 110 FIX ; 2VMAX1

$THETA 3.60 FIX ; 3CLL

$THETA 0.31 FIX ; 4EXPONENT

$THETA 59 FIX ; 5V2

$THETA 79 FIX ; 6V3

$THETA 27 FIX ; 7Q

$THETA 1 FIX ; 8KA

$THETA 1.32 FIX ; 9F1

$THETA 2.41 FIX ; 10T50

$THETA 0.82 FIX ; 11VMAXINH

$THETA 0.59 FIX ; 12PM_VMAX

$THETA 0.5 FIX ; 13EINH_CL

$THETA 2 FIX ; 14EIND_CL

$OMEGA 1 FIX ; 1IIV_KM

$OMEGA 0.5 FIX ; 2IIV_VMAX1

$OMEGA 0.2 FIX ; 3IIV_CLL

$OMEGA 0.3 FIX ; 4IIV_V2

$OMEGA 0.3 FIX ; 5IIV_V3

$OMEGA 0.5 FIX ; 6IIV_F1

$SIGMA 0.1 FIX ; prop EPS(1)

$ESTIMATION METHOD=1 INTER NOABORT MAXEVAL=0 PRINT=5 MCETA=100

$COVARIANCE PRINT=E

$TABLE …

### Model 1 (M1)

$PROBLEM Pascual et al. 2012 (M1) [2]

$INPUT …

$DATA …

$SUBROUTINE ADVAN2 TRANS2

$ABBR REPLACE ETA(OCC_F1)=ETA(3,4,5,6,7,8,9)

$PK

; Linear clearance (L/h)

TVCL=THETA(1)*(1+THETA(5)*RIF)*(1+THETA(6)*CHOL)

CL=TVCL*EXP(ETA(1))

; Central volume of distribution (L)

TVV=THETA(2)

V=TVV

; First order absorption rate constant (h-1)

TVKA=THETA(3)

KA=TVKA

; Oral bioavailability in adults

TVF1=THETA(4)

LGF1=LOG(TVF1/(1-TVF1))

F1=EXP(LGF1+ETA(2)+ETA(OCC_F1))/(1+EXP(LGF1+ETA(2)+ETA(OCC_F1)))

; Scaling factors

S2=V

$ERROR

IPRED=F

W=F

IRES=DV-IPRED

IWRES=IRES/W

Y=F+F*EPS(1)

$THETA 5.2 FIX ; 1CL

$THETA 92 FIX ; 2V

$THETA 1.1 FIX ; 3KA

$THETA 0.63 FIX ; 4F1

$THETA 3.0 FIX ; 5RIF_CL

$THETA-0.52 FIX ; 6CHOL_CL

$OMEGA 0.14842 FIX ; 1IIV_V (40 %CV)

$OMEGA 0.533917 FIX ; 2IIV_F1 (84 %CV within the logit function)

$OMEGA BLOCK(1) 0.6232074 FIX ; 3IOV on F1 (OCC: 1)

$OMEGA BLOCK(1) SAME ; 4IOV on F1 (OCC: 2)

$OMEGA BLOCK(1) SAME ; 5IOV on F1 (OCC: 3)

$OMEGA BLOCK(1) SAME ; 6IOV on F1 (OCC: 4)

$OMEGA BLOCK(1) SAME ; 7IOV on F1 (OCC: 5)

$OMEGA BLOCK(1) SAME ; 8IOV on F1 (OCC: 6)

$OMEGA BLOCK(1) SAME ; 9IOV on F1 (OCC: 7)

$SIGMA 0.298696 FIX ; prop EPS(1) (59%)

$ESTIMATION METHOD=1 INTER NOABORT MAXEVAL=0 PRINT=5 MCETA=100

$COVARIANCE PRINT=E

$TABLE …

### Model 2 (M2)

$PROBLEM Wang et al. 2014 (M2) [3]

$INPUT …

$DATA …

$SUBROUTINE ADVAN2 TRANS2

$PK

; Linear clearance (L/h)

TVCL=THETA(1)*(1-THETA(5)*(AGE-61))*(1-THETA(6)*PM)*(1-THETA(7)*(ALP-104))

CL=TVCL*EXP(ETA(1))

; Central volume of distribution (L)

TVV=THETA(2)*(1+THETA(8)*(AGE-61))

V=TVV*EXP(ETA(2))

; First order absorption rate constant (h-1)

TVKA=THETA(3)

KA=TVKA

; Oral bioavailability in adults

TVF1=THETA(4)

F1=TVF1*EXP(ETA(3))

; Scaling factors

S2=V

$ERROR

IPRED=F

W=F

IRES=DV-IPRED

IWRES=IRES/W

Y=F+F*EPS(1)+EPS(2)

$THETA 6.95 FIX ; 1CL

$THETA 200 FIX ; 2V

$THETA 1.1 FIX ; 3KA

$THETA 0.895 FIX ; 4F1

$THETA 0.012 FIX ; 5AGE_CL

$THETA 0.37 FIX ; 6PM_CL

$THETA 0.0016 FIX ; 7ALP_CL

$OMEGA 0.07915216 FIX ; 1IIV_CL 28.7 %CV

$OMEGA 0.06252024 FIX ; 2IIV_V 25.4 %CV

$OMEGA 0.0350978 FIX ; 3IIV_F1 18.9 %CV

$SIGMA 0.0115965 FIX ; prop EPS(1) 10.8%

$SIGMA 0.016 FIX ; add EPS(2) 0.016 mg/L

$ESTIMATION METHOD=1 INTER NOABORT MAXEVAL=0 PRINT=5 MCETA=100

$COVARIANCE PRINT=E

$TABLE …

# References

1. McDougall DAJ, Martin J, Playford EG, Green B. Determination of a suitable voriconazole pharmacokinetic model for personalised dosing. J Pharmacokinet Pharmacodyn. Springer US; 2015;43:1–13.

2. Pascual A, Csajka C, Buclin T, Bolay S, Bille J, Calandra T, et al. Challenging recommended oral and intravenous voriconazole doses for improved efficacy and safety: Population pharmacokinetics-based analysis of adult patients with invasive fungal infections. Clin Infect Dis. 2012;55:381–90.

3. Wang T, Chen S, Sun J, Cai J, Cheng X, Dong H, et al. Identification of factors influencing the pharmacokinetics of voriconazole and the optimization of dosage regimens based on Monte Carlo simulation in patients with invasive fungal infections. J Antimicrob Chemother. 2014;69:463–70.
